# Supplementary material
Source: PubMed Central journal article supplement (PMC11028053)
Supplement: 262_2018_2258_MOESM1_ESM.pdf [file 262_2018_2258_MOESM1_ESM.pdf]

**Supplementary table 1:** Association of sCTLA-4 serum levels with best overall response in IPI-treated MM patients without the mucosal subgroup.

| sCTLA-4 levels (pg/ml) | Total | irCR+irPR |       | irSD |       | irPD |       | irSD vs irCR+irPR |           |         | irPD vs irCR+irPR |           |         |
|------------------------|-------|-----------|-------|------|-------|------|-------|-------------------|-----------|---------|-------------------|-----------|---------|
|                        |       | N         | %     | N    | %     | N    | %     | OR                | 95%CL     | P-value | OR                | 95%CL     | P-value |
| ≤ 200.56               | 51    | 7         | 36.8  | 6    | 40.0  | 38   | 56.7  | 1.00              | (Ref.)    | 0.224   | 1.00              | (Ref.)    | 0.020   |
| > 200.56               | 50    | 12        | 63.2  | 9    | 60.0  | 29   | 43.3  | 0.26              | 0.03-2.27 |         | 0.11              | 0.02-0.70 |         |
| Whole sample           | 101   | 19        | 100.0 | 15   | 100.0 | 67   | 100.0 | -                 | -         | -       | -                 | -         | -       |

Association of sCTLA-4 serum levels with BOR was estimated through a multinomial logistic regression modelling using the value 200.56 pg/ml as cutoff point for serum sCTLA-4 levels. Detection of sCTLA-4 levels was performed by ELISA. All samples were tested in duplicate with deviation between duplicates lower than 10% for any reported value.

*IPI ipilimumab, irCR immune-related complete response, irPR immune-related partial response, irSD immune-related stable disease, irPD immune-related progressive disease, OR odds ratio adjusted for age at 1<sup>st</sup> IPI cycle, gender, time from diagnosis, LDH levels, dNLR, pre-IPI immunotherapy, brain, liver and cutaneous metastases and participating center; 95%CL 95% confidence, P-value significance level of the likelihood ratio test, Ref. reference category.*

**Supplementary table 2:** Correlation of sCTLA-4 serum levels with twelve, twenty-four and thirty-six month overall survival probabilities in IPI-treated MM patients without the mucosal subgroup.

| sCTLA-4 levels (pg/ml) | N D D% |       |       | Follow-up time (months) |          | Overall survival |           |          |           |          |           | P-value |
|------------------------|--------|-------|-------|-------------------------|----------|------------------|-----------|----------|-----------|----------|-----------|---------|
|                        |        |       |       |                         |          | 12-month         |           | 24-month |           | 36-month |           |         |
|                        | Median | Range | Prob. | 95%CL                   | Prob.    | 95%CL            | Prob.     | 95%CL    |           |          |           |         |
| ≤ 200.56               | 51     | 44    | 86.3  | 5.0                     | 0.1-49.9 | 0.28             | 0.19-0.40 | 0.15     | 0.07-0.26 | 0.13     | 0.05-0.24 | 0.120   |
| > 200.56               | 50     | 44    | 88.0  | 12.6                    | 0.2-52.6 | 0.52             | 0.37-0.65 | 0.28     | 0.17-0.41 | 0.18     | 0.08-0.29 |         |
| Whole sample           | 101    | 88    | 87.1  | 7.4                     | 0.1-52.6 | 0.36             | 0.30-0.49 | 0.22     | 0.14-0.30 | 0.15     | 0.08-0.23 | -       |

Overall survival probabilities were estimated through the Kaplan-Meier method according to sCTLA-4 serum levels using 200.56 pg/ml as cutoff point.

*IPI ipilimumab, N number of patients entered the study, D/D% number/percentage of deaths during the follow-up period, Prob. survival probability, 95%CL confidence limits of Prob., P-value significance level of the log-rank test.*
